# Supplementary material for: Focused Ultrasound Stimulation as a Neuromodulatory Tool for Parkinson’s Disease: A Scoping Review
Source: MDPI journal article supplement (doi:10.3390/brainsci12020289), 2022-02-19
Supplement: s1 [file s1]

**Table S1:** Search strategies across the four electronic databases as of 13 January 2022

| OVID Medline 78             |                                                                                                                                                                |
|-----------------------------|----------------------------------------------------------------------------------------------------------------------------------------------------------------|
| No.                         | Search term                                                                                                                                                    |
| PD concept                  |                                                                                                                                                                |
| 1                           | exp Parkinson Disease/ or Parkinson disease.tw. or PD.tw.                                                                                                      |
| FUS neuromodulation concept |                                                                                                                                                                |
| 2                           | exp Ultrasonic Waves/ or exp Ultrasonic Therapy/ or ultrasound.tw. or<br>focused ultrasound.tw. or LILFU.tw. or low intensity, low frequency<br>ultrasound.tw. |
| 3                           | (stimulation or neuromodulation).tw.                                                                                                                           |
| 4                           | 2 and 3                                                                                                                                                        |
| Combined concept            |                                                                                                                                                                |
| 5                           | 1 and 4                                                                                                                                                        |
| OVID Embase 264             |                                                                                                                                                                |
| No.                         | Search term                                                                                                                                                    |

|                                    |                                                                                                                                                                                                                                                                                                                                                                                                                                                                |
|------------------------------------|----------------------------------------------------------------------------------------------------------------------------------------------------------------------------------------------------------------------------------------------------------------------------------------------------------------------------------------------------------------------------------------------------------------------------------------------------------------|
| <b>PD concept</b>                  |                                                                                                                                                                                                                                                                                                                                                                                                                                                                |
| 1                                  | exp Parkinson Disease/ or Parkinson disease.tw. or PD.tw.                                                                                                                                                                                                                                                                                                                                                                                                      |
| <b>FUS neuromodulation concept</b> |                                                                                                                                                                                                                                                                                                                                                                                                                                                                |
| 2                                  | exp focused ultrasound surgery/ or exp focused ultrasound therapy/ or exp low intensity focused ultrasound/ or exp low intensity pulsed ultrasound/ or exp low intensity ultrasound/ or exp MR-guided focused ultrasound/ or exp pulsed ultrasound/ or exp transcranial magnetic resonance guided focused ultrasound/ or exp ultrasound/ or exp<br><br>or ultrasound.tw. or focused ultrasound.tw. or LILFU.tw. or low intensity, low frequency ultrasound.tw. |
| 3                                  | exp neuromodulation/ or (stimulation or neuromodulation).tw.                                                                                                                                                                                                                                                                                                                                                                                                   |
| 4                                  | 2 and 3                                                                                                                                                                                                                                                                                                                                                                                                                                                        |
| <b>Combined concepts</b>           |                                                                                                                                                                                                                                                                                                                                                                                                                                                                |
| 5                                  | 1 and 4                                                                                                                                                                                                                                                                                                                                                                                                                                                        |
| <b>Web of Science 25</b>           |                                                                                                                                                                                                                                                                                                                                                                                                                                                                |

|                                                         |                                                                                                     |
|---------------------------------------------------------|-----------------------------------------------------------------------------------------------------|
| 1                                                       | Parkinson Disease (All Fields) and focused ultrasound (All Fields) and neuromodulation (All Fields) |
| <b>Cochrane Central Register of Controlled Trials 6</b> |                                                                                                     |
| No.                                                     | Search term                                                                                         |
| <b>PD concept</b>                                       |                                                                                                     |
| 1                                                       | MeSH descriptor: [Parkinson Disease] explode all trees                                              |
| 2                                                       | (Parkinson disease):ti,ab,kw                                                                        |
| 3                                                       | #1 OR #2                                                                                            |
| <b>FUS neuromodulation concept</b>                      |                                                                                                     |
| 4                                                       | MeSH descriptor: [Ultrasonic Therapy] explode all trees                                             |
| 5                                                       | (low intensity focused ultrasound):ti,ab,kw                                                         |
| 6                                                       | (focused ultrasound):ti,ab,kw                                                                       |
| 7                                                       | (LILFU):ti,ab,kw                                                                                    |
| 8                                                       | #4 or #5 or #6 or #7                                                                                |
| 9                                                       | (neuromodulation):ti,ab,kw                                                                          |
| 10                                                      | (stimulation):ti,ab,kw                                                                              |

|                          |            |
|--------------------------|------------|
| 11                       | #9 or #10  |
| 12                       | #8 and #11 |
| <b>Combined concepts</b> |            |
| 13                       | #3 and #12 |

**Table S2:** Inclusion and exclusion criteria used to assess eligibility of studies.

| Inclusion criteria                                                                                                                                                                                                     | Exclusion criteria                                                                                                                                                                                                                                                                                                                                                                                                        |
|------------------------------------------------------------------------------------------------------------------------------------------------------------------------------------------------------------------------|---------------------------------------------------------------------------------------------------------------------------------------------------------------------------------------------------------------------------------------------------------------------------------------------------------------------------------------------------------------------------------------------------------------------------|
| <ul style="list-style-type: none"><li>• Any published primary studies (preclinical or clinical using quantitative, qualitative or mixed methodology), reporting original data</li><li>• Studies on FUS in PD</li></ul> | <ul style="list-style-type: none"><li>• Non-primary studies: narrative reviews, systematic reviews and meta-analysis, editorials, commentaries, opinion papers, letters, education papers, conference abstracts, protocols, reports, theses or book chapters</li><li>• Studies not reporting data on FUS in PD at all</li><li>• Studies reporting data on FUS but not specific to PD</li><li>• Overlapping data</li></ul> |

\
